# Supplementary material
Source: publisher site journal article supplement (https://www.dovepress.com/article/334400)
Supplement: Supplementary file 1 [file get_supplementary_file.php]

**Table S1**. Left ventricular longitudinal strain at rest and postexercise

| Parameters | Total,  mean±SD | Total, 95% CI | Male,  mean±SD | Male, 95% CI | Female,  mean±SD | Female, 95% CI | *P*-value |
| --- | --- | --- | --- | --- | --- | --- | --- |
| Rest | | | | | | | |
| GLS (%) | 20.6±2.8 | 15.1-26.1 | 19.8±2.8 | 14.3-25.3 | 21.2±2.6 | 16.1-26.3 | 0.001 |
| LSbase (%) | 18.4±2.9 | 12.7-24.1 | 17.2±2.7 | 11.9-22.5 | 19.3±2.7 | 14.0-24.6 | <0.001 |
| LSmid (%) | 20.8±2.6 | 15.7-25.9 | 20.0±2.5 | 15.1-24.9 | 21.6±2.5 | 16.7-26.5 | <0.001 |
| LSapex (%) | 24.6±4.0 | 16.8-32.4 | 24.2±4.2 | 16.0-32.4 | 24.9±3.9 | 17.3-32.5 | 0.344 |
| Postexercise | | | | | | | |
| GLS (%) | 24.9±4.1 | 16.9-32.9 | 24.3±5.0 | 14.5-34.1 | 25.4±3.1 | 19.3-31.5 | 0.103 |
| LSbase (%) | 19.8±3.3 | 13.3-26.3 | 18.7±3.0 | 12.8-24.6 | 20.8±3.2 | 14.5-27.1 | <0.001 |
| LSmid (%) | 24.2±3.0 | 18.3-30.1 | 23.6±2.9 | 17.9-29.3 | 24.7±3.1 | 18.6-30.8 | 0.035 |
| LSapex (%) | 32.5±3.8 | 25.1-39.9 | 33.3±3.7 | 26.0-40.6 | 32.0±3.8 | 24.6-39.4 | 0.036 |

GLS, global longitudinal strain; LSbase, longitudinal strain at base of left ventricle; LSmid, longitudinal strain at the middle of left ventricle; LSapex, longitudinal strain at the apex of left ventricle.


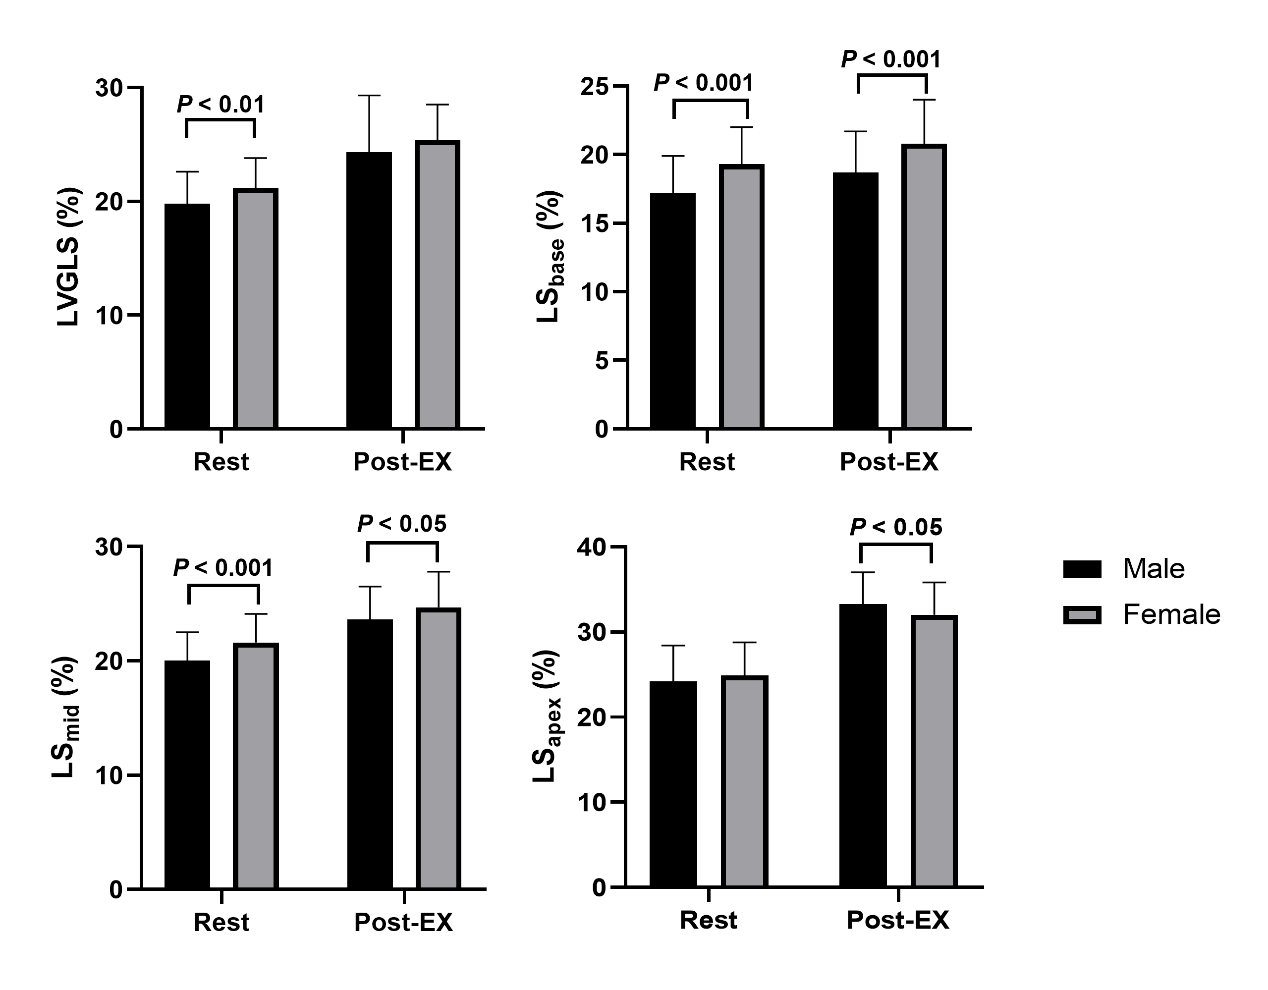


**Figure S1.** LV GLS and LS at basal, middle and apex of LV. GLS, LV LS of base, middle and apex were all increased after exercise. No significant difference was found at GLS after exercise. While there were significant differences in LS of all three levels at postexercise. LS, longitudinal strain; LV, left ventricle.
